# Supplementary material
Source: PubMed Central journal article supplement (PMC8939348)
Supplement: aem.02418-21-s0001.pdf [file aem.02418-21-s0001.pdf]

**Table S1.** Sanger sequencing of 16S rRNA genes and taxonomy assigned to genus level by BLASTn against the NCBI database.

| Facility | Isolate | Query cover<br>(%; F/R) | E-<br>value | Identity<br>(%; F/R) | Closest cultivated<br>genus |
|----------|---------|-------------------------|-------------|----------------------|-----------------------------|
| F1       | F1_1    | 100                     | 0.0         | 99.32                | <i>Tenacibaculum</i>        |
| F1       | F1_2    | 100/99                  | 0.0         | 98.38/98.02          | <i>Tenacibaculum</i>        |
| F1       | F1_3    | 99                      | 0.0         | 97.21                | <i>Tenacibaculum</i>        |
| F1       | F1_4    | 99                      | 0.0         | 98.74                | <i>Shewanella</i>           |
| F1       | F1_5    | 99                      | 0.0         | 98.92                | <i>Litoreibacter</i>        |
| F1       | F1_6    | 99/100                  | 0.0         | 98.70/99.12          | <i>Shewanella</i>           |
| F1       | F1_7    | 99/99                   | 0.0         | 98.75/97.48          | <i>Litoreibacter</i>        |
| F1       | F1_8    | 100/100                 | 0.0         | 98.82/98.26          | <i>Vibrio</i>               |
| F1       | F1_9    | 100/100                 | 0.0         | 97.77/98.30          | <i>Vibrio</i>               |
| F1       | F1_10   | 98/99                   | 0.0         | 98.70/98.73          | <i>Vibrio</i>               |
| F1       | F1_11   | 100                     | 0.0         | 99.31                | <i>Vibrio</i>               |
| F1       | F1_12   | 100/100                 | 0.0         | 98.56/98.76          | <i>Vibrio</i>               |
| F1       | F1_13   | 97/100                  | 0.0         | 98.41/98.43          | <i>Vibrio</i>               |
| F2       | F2_1    | 99/99                   | 0.0         | 98.92/99.17          | <i>Joostella</i>            |
| F2       | F2_2    | 100                     | 0.0         | 99.70                | <i>Joostella</i>            |
| F2       | F2_3    | 98/99                   | 0.0         | 98.93/99.72          | <i>Joostella</i>            |
| F2       | F2_4    | 100                     | 0.0         | 99.85                | <i>Joostella</i>            |
| F2       | F2_5    | N/A                     | N/A         | N/A                  | N/A                         |
| F2       | F2_6    | N/A                     | N/A         | N/A                  | N/A                         |
| F2       | F2_7    | 98/99                   | 0.0         | 98.18/98.44          | <i>Tenacibaculum</i>        |
| F2       | F2_8    | N/A                     | N/A         | N/A                  | N/A                         |
| F2       | F2_9    | 100                     | 0.0         | 99.18                | <i>Tenacibaculum</i>        |
| F2       | F2_10   | 99/99                   | 0.0         | 98.75/98.15          | <i>Epibacterium</i>         |
| F2       | F2_11   | 99/100                  | 0.0         | 97.89/97.79          | <i>Tenacibaculum</i>        |

|    |       |        |     |             |                          |
|----|-------|--------|-----|-------------|--------------------------|
| F2 | F2_12 | 100    | 0.0 | 99.92       | <i>Epibacterium</i>      |
| F2 | F2_13 | 99/100 | 0.0 | 98.06/99.07 | <i>Tenacibaculum</i>     |
| F2 | F2_14 | 99/100 | 0.0 | 97.98/98.33 | <i>Vibrio</i>            |
| F2 | F2_15 | 100    | 0.0 | 98.99       | <i>Vibrio</i>            |
| F2 | F2_16 | 99/100 | 0.0 | 98.14/98.26 | <i>Tenacibaculum</i>     |
| F2 | F2_17 | 97/100 | 0.0 | 99.12/99.58 | <i>Pseudoalteromonas</i> |
| F2 | F2_18 | 99     | 0.0 | 99.12       | <i>Tenacibaculum</i>     |
| F2 | F2_19 | 100    | 0.0 | 99.05       | <i>Pseudoalteromonas</i> |
| F2 | F2_20 | 100    | 0.0 | 99.10       | <i>Tenacibaculum</i>     |
| F2 | F2_21 | 100    | 0.0 | 99.65       | <i>Vibrio</i>            |
| F2 | F2_22 | 97     | 0.0 | 99.17       | <i>Tenacibaculum</i>     |
| F2 | F2_23 | 99     | 0.0 | 99.00       | <i>Pseudoalteromonas</i> |
| F2 | F2_24 | 100    | 0.0 | 99.07       | <i>Vibrio</i>            |
| F2 | F2_25 | 100    | 0.0 | 99.10       | <i>Tenacibaculum</i>     |
| F2 | F2_26 | 100    | 0.0 | 99.65       | <i>Pseudoalteromonas</i> |
| F2 | F2_27 | 100    | 0.0 | 99.79       | <i>Tenacibaculum</i>     |
| F2 | F2_28 | 99     | 0.0 | 99.77       | <i>Epibacterium</i>      |
| F2 | F2_29 | 100/99 | 0.0 | 98.22/99.62 | <i>Tenacibaculum</i>     |
| F2 | F2_30 | 95/100 | 0.0 | 90.99/98.91 | <i>Pseudoalteromonas</i> |
| F2 | F2_31 | 96     | 0.0 | 99.10       | <i>Pseudoalteromonas</i> |
| F2 | F2_32 | 100    | 0.0 | 98.31       | <i>Vibrio</i>            |
| F2 | F2_33 | 100    | 0.0 | 99.72       | <i>Tenacibaculum</i>     |
| F2 | F2_34 | 98     | 0.0 | 99.33       | <i>Pseudoalteromonas</i> |
| F2 | F2_35 | 98     | 0.0 | 98.60       | <i>Pseudoalteromonas</i> |

F/R: Forward read/Reverse read

N/A: Taxonomy could not be assigned at the genus level















|            |        |                                                     |   |   |   |   |   |   |   |   |   |   |   |   |   |   |   |   |   |   |   |
|------------|--------|-----------------------------------------------------|---|---|---|---|---|---|---|---|---|---|---|---|---|---|---|---|---|---|---|
| ompW       |        | Outer membrane protein W                            | 1 | 1 | 1 | 1 | 1 | 1 | 1 | 1 | 1 | 1 | 1 | 0 | 0 | 0 | 0 | 0 | 0 | 0 | 0 |
| macB_1     |        | Macrolide export ATP-binding/permease protein MacB  | 1 | 1 | 1 | 1 | 1 | 1 | 1 | 1 | 1 | 1 | 1 | 0 | 0 | 0 | 0 | 0 | 0 | 0 | 0 |
| susC_2     |        | TonB-dependent receptor SusC                        | 1 | 1 | 1 | 1 | 1 | 1 | 1 | 1 | 1 | 1 | 1 | 0 | 0 | 0 | 0 | 0 | 0 | 0 | 0 |
| fecR       |        | Protein FecR                                        | 1 | 1 | 1 | 1 | 1 | 1 | 1 | 1 | 1 | 1 | 1 | 0 | 0 | 0 | 0 | 0 | 0 | 0 | 0 |
| arfB       |        | Peptidyl-tRNA hydrolase ArfB                        | 1 | 1 | 1 | 1 | 1 | 1 | 1 | 1 | 1 | 1 | 1 | 0 | 0 | 0 | 0 | 0 | 0 | 0 | 0 |
| vgrG1_1    |        | Actin cross-linking toxin VgrG1                     | 1 | 1 | 1 | 1 | 1 | 1 | 1 | 1 | 1 | 1 | 1 | 0 | 0 | 0 | 0 | 0 | 0 | 0 | 0 |
| group_3784 | bepE_1 | Efflux pump membrane transporter BepE               | 1 | 1 | 1 | 1 | 1 | 1 | 1 | 1 | 1 | 1 | 1 | 0 | 0 | 0 | 0 | 0 | 0 | 0 | 0 |
| bepF       |        | Efflux pump periplasmic linker BepF                 | 1 | 1 | 1 | 1 | 1 | 1 | 1 | 1 | 1 | 1 | 1 | 0 | 0 | 0 | 0 | 0 | 0 | 0 | 0 |
| clpC_1     |        | ATP-dependent Clp protease ATP-binding subunit ClpC | 1 | 1 | 1 | 1 | 1 | 1 | 1 | 1 | 1 | 1 | 1 | 0 | 0 | 0 | 0 | 0 | 0 | 0 | 0 |
| ndx1       |        | Diadenosine hexaphosphate hydrolase                 | 1 | 1 | 1 | 1 | 1 | 1 | 1 | 1 | 1 | 1 | 1 | 0 | 0 | 0 | 0 | 0 | 0 | 0 | 0 |
| dapF       |        | Diaminopimelate epimerase                           | 1 | 1 | 1 | 1 | 1 | 1 | 1 | 1 | 1 | 1 | 1 | 0 | 0 | 0 | 0 | 0 | 0 | 0 | 0 |
| atoC       |        | Regulatory protein AtoC                             | 1 | 1 | 1 | 1 | 1 | 1 | 1 | 1 | 1 | 1 | 1 | 0 | 0 | 0 | 0 | 0 | 0 | 0 | 0 |
| nemR       |        | HTH-type transcriptional regulator YxaF             | 1 | 1 | 1 | 1 | 1 | 1 | 1 | 1 | 1 | 1 | 1 | 0 | 0 | 0 | 0 | 0 | 0 | 0 | 0 |
| benM_2     |        | HTH-type transcriptional regulator BenM             | 1 | 1 | 1 | 1 | 1 | 1 | 1 | 1 | 1 | 1 | 1 | 0 | 0 | 0 | 0 | 0 | 0 | 0 | 0 |
| uspG       |        | Universal stress protein UP12                       | 1 | 1 | 1 | 1 | 1 | 1 | 1 | 1 | 1 | 1 | 1 | 0 | 0 | 0 | 0 | 0 | 0 | 0 | 0 |
| dapb3      |        | Dipeptidyl aminopeptidase BIII                      | 1 | 1 | 1 | 1 | 1 | 1 | 1 | 1 | 1 | 1 | 1 | 0 | 0 | 0 | 0 | 0 | 0 | 0 | 0 |
| yfkO_2     |        | NAD(P)H nitroreductase YfkO                         | 1 | 1 | 1 | 1 | 1 | 1 | 1 | 1 | 1 | 1 | 1 | 0 | 0 | 0 | 0 | 0 | 0 | 0 | 0 |
| yjdJ       |        | protein YjdJ                                        | 1 | 1 | 1 | 1 | 1 | 1 | 1 | 1 | 1 | 1 | 1 | 0 | 0 | 0 | 0 | 0 | 0 | 0 | 0 |
| group_3890 |        | tautomerase                                         | 1 | 1 | 1 | 1 | 1 | 1 | 1 | 1 | 1 | 1 | 1 | 0 | 0 | 0 | 0 | 0 | 0 | 0 | 0 |
| group_3891 | crp    | cAMP-activated global transcriptional regulator CRP | 1 | 1 | 1 | 1 | 1 | 1 | 1 | 1 | 1 | 1 | 1 | 0 | 0 | 0 | 0 | 0 | 0 | 0 | 0 |
| group_3903 |        | Butanoate coenzyme A-transferase                    | 1 | 1 | 1 | 1 | 1 | 1 | 1 | 1 | 1 | 1 | 1 | 0 | 0 | 0 | 0 | 0 | 0 | 0 | 0 |
| group_3905 | metF   | 5,10-methylenetetrahydrofolate reductase            | 1 | 1 | 1 | 1 | 1 | 1 | 1 | 1 | 1 | 1 | 1 | 0 | 0 | 0 | 0 | 0 | 0 | 0 | 0 |
| norB       |        | Nitric oxide reductase subunit B                    | 1 | 1 | 1 | 1 | 1 | 1 | 1 | 1 | 1 | 1 | 1 | 0 | 0 | 0 | 0 | 0 | 0 | 0 | 0 |
| mfpA       |        | Pentapeptide repeat protein MfpA                    | 1 | 1 | 1 | 1 | 1 | 1 | 1 | 1 | 1 | 1 | 1 | 0 | 0 | 0 | 0 | 0 | 0 | 0 | 0 |
| group_4336 |        | PKHD-type hydroxylase                               | 1 | 1 | 1 | 1 | 1 | 1 | 1 | 1 | 1 | 1 | 1 | 0 | 0 | 0 | 0 | 0 | 0 | 0 | 0 |
| aprE       |        | Subtilisin E                                        | 1 | 1 | 1 | 1 | 1 | 1 | 1 | 1 | 1 | 1 | 1 | 0 | 0 | 0 | 0 | 0 | 0 | 0 | 0 |
| betS       |        | Glycine betaine/proline betaine transporter BetS    | 1 | 1 | 1 | 1 | 1 | 1 | 1 | 1 | 1 | 1 | 1 | 0 | 0 | 0 | 0 | 0 | 0 | 0 | 0 |
| glsA2      |        | Glutaminase 2                                       | 1 | 1 | 1 | 1 | 1 | 1 | 1 | 1 | 1 | 1 | 1 | 0 | 0 | 0 | 0 | 0 | 0 | 0 | 0 |
| acoD       |        | Acetaldehyde dehydrogenase 2                        | 1 | 1 | 1 | 1 | 1 | 1 | 1 | 1 | 1 | 1 | 1 | 0 | 0 | 0 | 0 | 0 | 0 | 0 | 0 |
| araC       |        | Arabinose operon regulatory protein                 | 1 | 1 | 1 | 1 | 1 | 1 | 1 | 1 | 1 | 1 | 1 | 0 | 0 | 0 | 0 | 0 | 0 | 0 | 0 |
| phy        |        | 3-phytase                                           | 1 | 1 | 1 | 1 | 1 | 1 | 1 | 1 | 1 | 1 | 1 | 0 | 0 | 0 | 0 | 0 | 0 | 0 | 0 |
| macB_2     |        | Macrolide export ATP-binding/permease protein MacB  | 1 | 1 | 1 | 1 | 1 | 1 | 1 | 1 | 1 | 1 | 1 | 0 | 0 | 0 | 0 | 0 | 0 | 0 | 0 |

|            |                                                                    |   |   |   |   |   |   |   |   |   |   |   |   |   |   |   |   |   |   |
|------------|--------------------------------------------------------------------|---|---|---|---|---|---|---|---|---|---|---|---|---|---|---|---|---|---|
| cydA       | Cytochrome bd ubiquinol oxidase subunit 1                          | 1 | 1 | 1 | 1 | 1 | 1 | 1 | 1 | 1 | 0 | 0 | 0 | 0 | 0 | 0 | 0 | 0 | 0 |
| deoD_2     | Purine nucleoside phosphorylase DeoD-type                          | 1 | 1 | 1 | 1 | 1 | 1 | 1 | 1 | 1 | 0 | 0 | 0 | 0 | 0 | 0 | 0 | 0 | 0 |
| group_5479 | Bifunctional NMN adenylyltransferase/Nudix hydrolase               | 1 | 1 | 1 | 1 | 1 | 1 | 1 | 1 | 1 | 0 | 0 | 0 | 0 | 0 | 0 | 0 | 0 | 0 |
| accA1      | Acetyl-/propionyl-coenzyme A carboxylase alpha chain               | 1 | 1 | 1 | 1 | 1 | 1 | 1 | 1 | 1 | 0 | 0 | 0 | 0 | 0 | 0 | 0 | 0 | 0 |
| pccB       | Propionyl-CoA carboxylase beta chain                               | 1 | 1 | 1 | 1 | 1 | 1 | 1 | 1 | 1 | 0 | 0 | 0 | 0 | 0 | 0 | 0 | 0 | 0 |
| topB       | DNA topoisomerase 3                                                | 1 | 1 | 1 | 1 | 1 | 1 | 1 | 1 | 1 | 0 | 0 | 0 | 0 | 0 | 0 | 0 | 0 | 0 |
| msrC       | Free methionine-R-sulfoxide reductase                              | 1 | 1 | 1 | 1 | 1 | 1 | 1 | 1 | 1 | 0 | 0 | 0 | 0 | 0 | 0 | 0 | 0 | 0 |
| vgrG1_2    | Actin cross-linking toxin VgrG1                                    | 1 | 1 | 1 | 1 | 1 | 1 | 1 | 1 | 1 | 0 | 0 | 0 | 0 | 0 | 0 | 0 | 0 | 0 |
| tri1_1     | Tricorn protease                                                   | 1 | 1 | 1 | 1 | 1 | 1 | 1 | 1 | 1 | 0 | 0 | 0 | 0 | 0 | 0 | 0 | 0 | 0 |
| sigA_1     | RNA polymerase sigma factor SigA                                   | 1 | 1 | 1 | 1 | 1 | 1 | 1 | 1 | 1 | 0 | 0 | 0 | 0 | 0 | 0 | 0 | 0 | 0 |
| clpB       | Chaperone protein ClpB                                             | 1 | 1 | 1 | 1 | 1 | 0 | 1 | 1 | 0 | 0 | 0 | 0 | 0 | 0 | 0 | 0 | 0 | 0 |
| nrdG       | Anaerobic ribonucleoside-triphosphate reductase-activating protein | 1 | 1 | 1 | 1 | 1 | 0 | 1 | 1 | 0 | 0 | 0 | 0 | 0 | 0 | 0 | 0 | 0 | 0 |
| spkD       | Serine/threonine-protein kinase D                                  | 1 | 1 | 1 | 1 | 1 | 0 | 1 | 1 | 0 | 0 | 0 | 0 | 0 | 0 | 0 | 0 | 0 | 0 |
| fpvA_1     | Ferripyoverdine receptor                                           | 1 | 1 | 1 | 1 | 1 | 0 | 1 | 1 | 0 | 0 | 0 | 0 | 0 | 0 | 0 | 0 | 0 | 0 |
| mecl       | Methicillin resistance regulatory protein Mecl                     | 1 | 1 | 1 | 1 | 1 | 0 | 1 | 1 | 0 | 0 | 0 | 0 | 0 | 0 | 0 | 0 | 0 | 0 |
| nuc        | Thermonuclease                                                     | 1 | 1 | 1 | 1 | 1 | 0 | 1 | 1 | 0 | 0 | 0 | 0 | 0 | 0 | 0 | 0 | 0 | 0 |
| alsT_2     | Amino-acid carrier protein AlsT                                    | 1 | 1 | 1 | 1 | 1 | 0 | 1 | 1 | 0 | 0 | 0 | 0 | 0 | 0 | 0 | 0 | 0 | 0 |

**1: Gene present**

**0: Gene absent**

**Table S3.** Chrome Azurol S (CAS) assay for detection of siderophore excretion under various growth conditions.

|                                                                  | CAS assay                  |       |                            |       |       |       |
|------------------------------------------------------------------|----------------------------|-------|----------------------------|-------|-------|-------|
|                                                                  | Growth conditions          |       |                            |       |       |       |
|                                                                  | 1.5% SS <sub>CAS+GLU</sub> |       | 1.5% SS <sub>CAS+MAN</sub> |       | ½YTSS |       |
|                                                                  | 15° C                      | 25° C | 15° C                      | 25° C | 15° C | 25° C |
| DSM 17995 ( <i>T. maritimum</i> )                                | -                          | -     | -                          | -     | -     | -     |
| F2_1 ( <i>J. atrarenae</i> )                                     | -                          | -     | -                          | -     | -     | -     |
| F1_2 ( <i>T. soleae</i> )                                        | -                          | -     | -                          | -     | -     | -     |
| F2_9 ( <i>T. mesophilum</i> )                                    | -                          | -     | -                          | -     | -     | -     |
| F2_11 ( <i>T. discolor</i> )                                     | -                          | -     | -                          | -     | -     | -     |
| Positive control<br>( <i>Pseudoalteromonas piscicidae</i> S2040) | +                          | +     | +                          | +     | +     | +     |
| Negative control                                                 | -                          | -     | -                          | -     | -     | -     |

+/- denotes a positive or negative reaction in the assay.
